# Supplementary material for: Zinc lozenges and the common cold: a meta-analysis comparing zinc acetate and zinc gluconate, and the role of zinc dosage
Source: PubMed Central journal article supplement — JRSM Open. 2017 May 2;8(5):2054270417694291. doi: 10.1177/2054270417694291 (PMC5418896; doi:10.1177/2054270417694291), 2017-05-02
Supplement: SHR694291_supplementary_material2.pdf [file SHR694291_supplementary_material2.pdf]

# Zinc lozenges and the common cold: a meta-analysis comparing zinc acetate and zinc gluconate, and the role of zinc dosage

Harri Hemilä

## Supplementary File 2

Nov 20, 2016

### This file contains

- transformation of common cold duration (days) to the relative scale
- additional forest plots

### Page

2 Normalization of common cold duration to the scale of Placebo group = 100%

#### **Forest plots**

3 7 trials: comparison of Zn acetate and Zn gluconate

4 7 trials: comparison of low dose vs. high dose lozenges

5 Turner (2000) excluded: comparison of Zn acetate and Zn gluconate

6 Turner (2000) excluded: comparison of low dose vs. high dose lozenges

7 Mossad (1996) trial: re-analysis of the recovery curve

## Normalization of the common cold duration to the scale of Placebo group = 100%

The values on the right hand side are used. These values are calculated by dividing the figures on the left hand side by the mean common cold duration in the placebo group on the left side. This leads to percentage scale so that all the differences between Zn and placebo groups are percentage effects.

| Trial [ref]           | Duration is based on: <sup>a</sup> | Duration of colds (days) |       |         |       | Duration of colds (% of the placebo level) |      |         |      |
|-----------------------|------------------------------------|--------------------------|-------|---------|-------|--------------------------------------------|------|---------|------|
|                       |                                    | Zn                       |       | Placebo |       | Zn                                         |      | Placebo |      |
|                       |                                    | mean                     | SD    | mean    | SD    | mean                                       | SD   | mean    | SD   |
| <b>Zinc acetate</b>   |                                    |                          |       |         |       |                                            |      |         |      |
| Petrus 1998 [22]      | Data set                           | 5.288                    | 2.569 | 7.061   | 3.907 | 74.9                                       | 36.4 | 100     | 55.3 |
| Prasad 2000 [23]      | Report+Fig                         | 4.44                     | 1.56  | 8.09    | 1.81  | 54.9                                       | 19.3 | 100     | 22.3 |
| Prasad 2008 [24]      | Report                             | 4.00                     | 1.04  | 7.12    | 1.26  | 56.2                                       | 14.6 | 100     | 17.7 |
| <b>Zinc gluconate</b> |                                    |                          |       |         |       |                                            |      |         |      |
| Eby 1984 [1]          | Fig                                | 3.92                     | 2.61  | 7.54    | 3.18  | 52.0                                       | 34.7 | 100     | 42.2 |
| Godfrey 1992 [20]     | from t                             | 4.86                     | 2.70  | 6.13    | 2.70  | 79.3                                       | 44.0 | 100     | 44.0 |
| Mossad 1996 [21]      | Fig                                | 5.20                     | 2.83  | 9.20    | 5.32  | 56.6                                       | 30.7 | 100     | 57.8 |
| Turner 2000 [25]      | Fig                                | 7.41                     | 3.88  | 7.55    | 3.96  | 98.1                                       | 51.4 | 100     | 52.5 |

<sup>a</sup> “**Report**” indicates that the mean and SD were reported in the study report.

“**from t**” indicates that the t value was reported and the corresponding SD was calculated from it.

“**Fig**” indicates that the results were reported as a survival curve in the study reports: see [2] for the calculation of the mean and SD:

<http://www.ncbi.nlm.nih.gov/pmc/articles/PMC3136969>

[http://www.ncbi.nlm.nih.gov/pmc/articles/PMC3136969/bin/TORMJ-5-51\\_SD1.zip](http://www.ncbi.nlm.nih.gov/pmc/articles/PMC3136969/bin/TORMJ-5-51_SD1.zip)

The Mossad (1996) data were reanalyzed which led to small differences compared with the 2011 analyses, see p. 7 of this Supplementary file.

The Petrus (1998) study mean and SD values were calculated from the data set that was made available by Dr. Petrus. The outcome in this analysis was the longest common cold symptom.

## Duration of the common cold:

These forest plots were constructed with the RevMan program (<http://tech.cochrane.org/revman> )

## 7 trials: comparison of Zn acetate and Zn gluconate

Overall effect is **33.31%** shorter duration of colds.

Zn **acetate** lozenges shortened colds by 40.49%

Zn **gluconate** lozenges shortened colds by 28.36%

There is no evidence that the two subgroups differ, with  $I^2 = 0\%$  ( $P = 0.33$ )

There is strong evidence that the 7 trials are heterogeneous, with  $I^2 = 77\%$  ( $P = 0.0002$ )

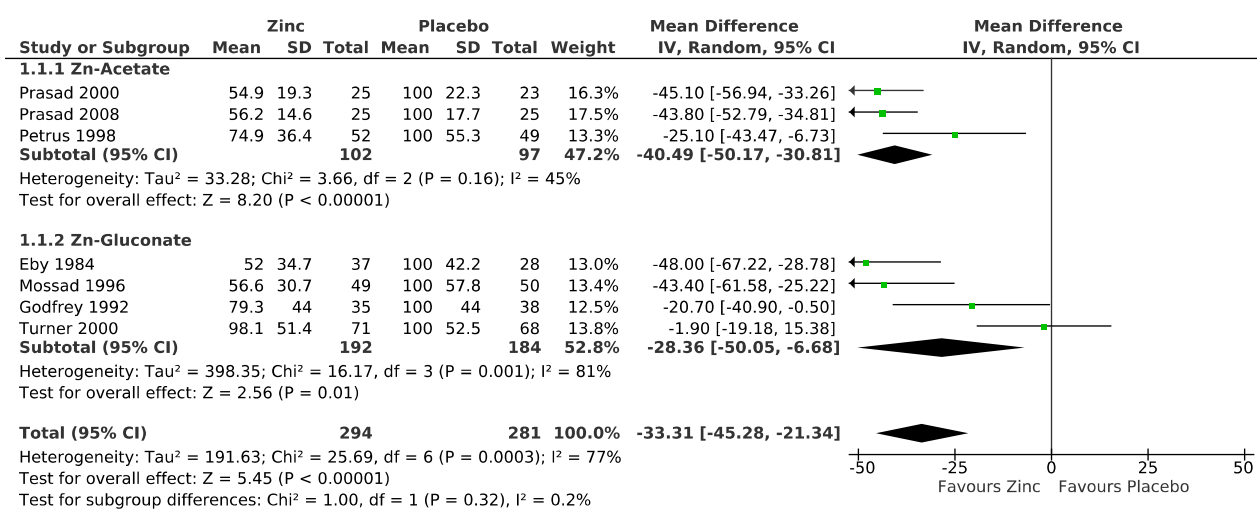

## 7 trials: comparison of low dose vs. high dose lozenges

Overall effect is **33.31%** shorter duration of colds.

**Low** dose lozenges shortened colds by 32.75%

**High** dose lozenges shortened colds by 34.54%

There is no evidence that the two subgroups differ, with  $I^2 = 0\%$  ( $P = 0.92$ )

There is strong evidence that the 7 trials are heterogeneous, with  $I^2 = 77\%$  ( $P = 0.0002$ )

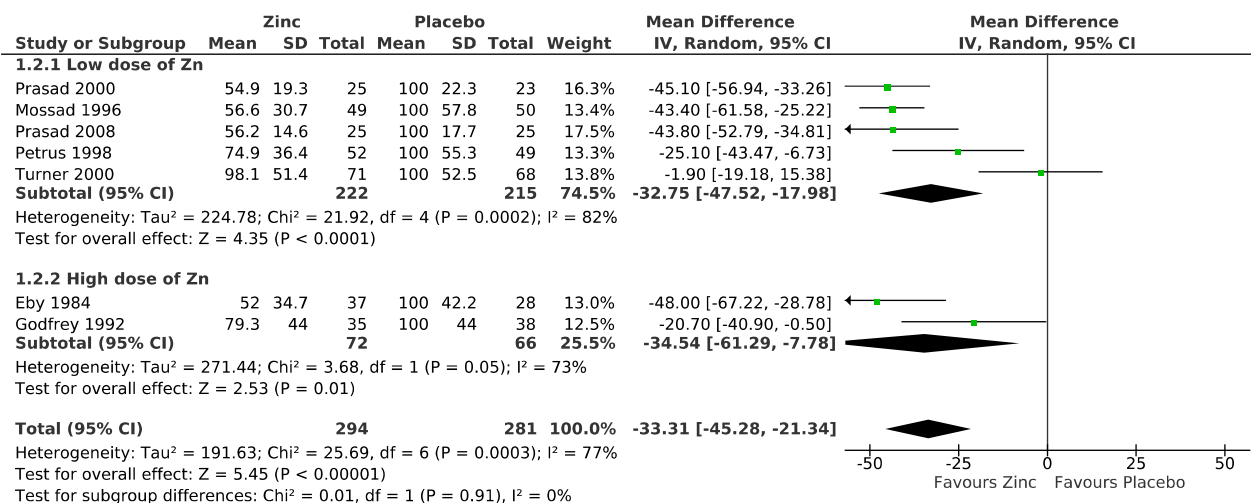

**Exclusion of the Turner (2000) trial as an outlier**

**Turner (2000) excluded: comparison of Zn acetate and Zn gluconate**

Overall effect of zinc lozenges is **39.51%** shorter duration of colds.

Zinc **acetate** shortened colds by 40.49%

Zinc **gluconate** shortened colds by 37.74%

There is no evidence that the subgroups differ, with  $I^2 = 0\%$  ( $P = 0.81$ )

There is no significant heterogeneity over the 6 zinc lozenge trials, with  $I^2 = 39\%$  ( $P = 0.14$ )

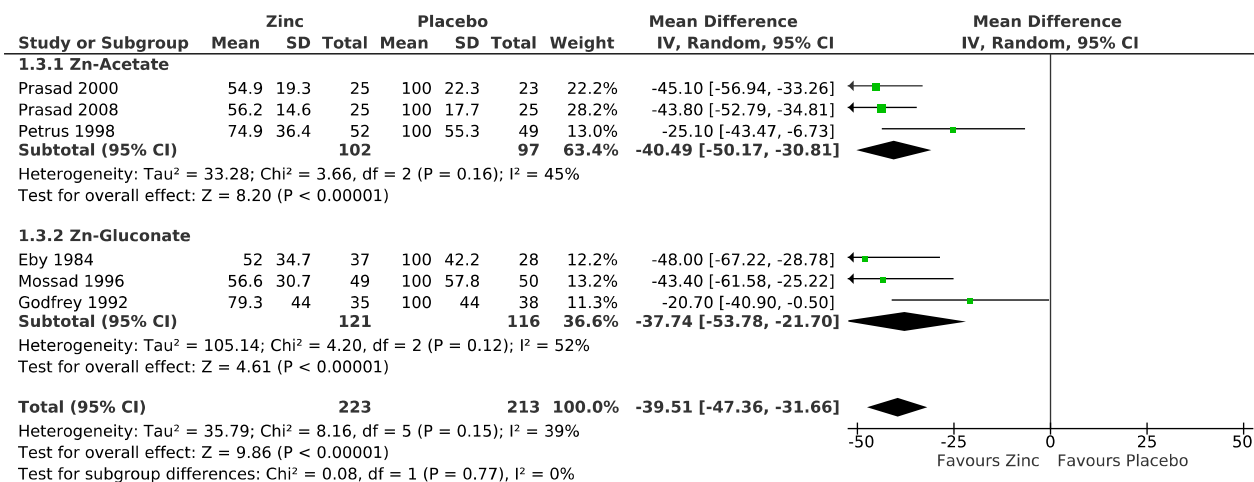

**Exclusion of the Turner (2000) trial as an outlier**

**Turner (2000) excluded: comparison of low dose vs. high dose lozenges**

Overall effect of zinc lozenges is **39.51%** shorter duration of colds.

**Low** doses of zinc shortened colds by 41.53%

**High** doses of zinc shortened colds by 34.54%

There is no evidence that the subgroups differ, with  $I^2 = 0\%$  ( $P = 0.61$ )

There is no significant heterogeneity over the 6 trials differ, with  $I^2 = 39\%$  ( $P = 0.14$ )

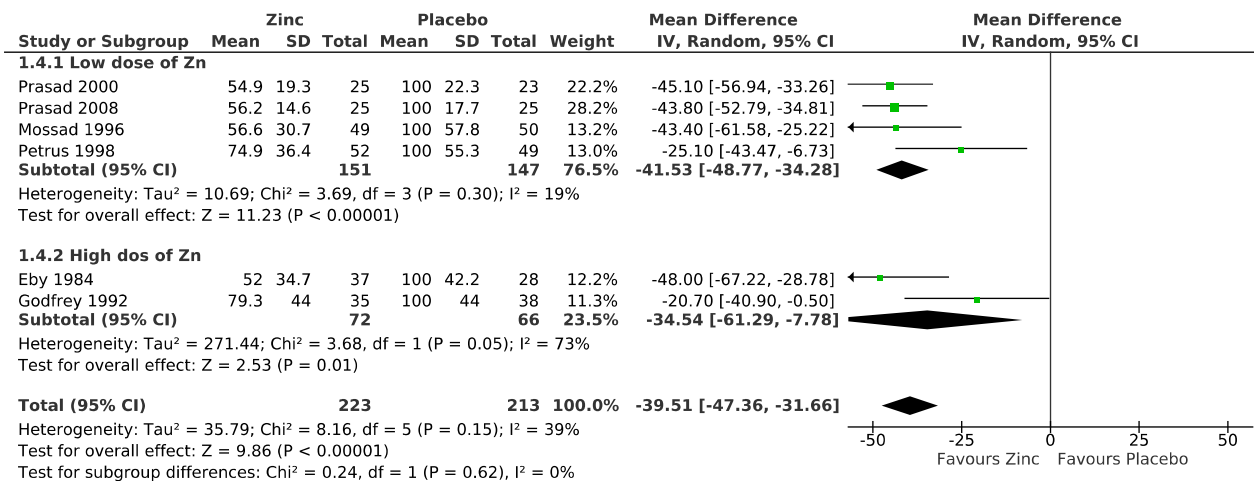

## Mossad (1996) imputation of censored observations and calculation of cold durations.

Mossad (1996) survival curve was measured in Hemilä (2011)[2], see Supplementary material 3 in: <http://www.ncbi.nlm.nih.gov/pmc/articles/PMC3136969>  
[http://www.ncbi.nlm.nih.gov/pmc/articles/PMC3136969/bin/TORMJ-5-51\\_SD1.zip](http://www.ncbi.nlm.nih.gov/pmc/articles/PMC3136969/bin/TORMJ-5-51_SD1.zip)

This is a new 2016 imputation of the days of the censored observations, with small changes compared with the 2011 imputations. This new version is used for calculating the mean and SD values. Censored observations were replaced with the duration as the day of censoring.

### Zinc group

Mossad 1996

Zn (n=49)

| Day | pixels<br>100%=<br>2274<br>(0 to 100%) | To<br>Fig<br>scale | Based on censoring,<br>(-1 participant censored)<br>rescaling on the days |                       | The bold No:s<br>are reported in<br>Mossad's<br>figure |                     |          | Calculation of<br>Kaplan-Meier estimates<br>from the inferred figures |                                                     |                      |
|-----|----------------------------------------|--------------------|---------------------------------------------------------------------------|-----------------------|--------------------------------------------------------|---------------------|----------|-----------------------------------------------------------------------|-----------------------------------------------------|----------------------|
|     |                                        |                    | To<br>persons<br>9th                                                      | To<br>persons<br>11th | To<br>person<br>integers                               | Cured<br>per<br>day | Censored | This<br>column                                                        | Difference<br>between<br>measured and<br>calculated | Relative<br>Absolute |
| 0   | 213                                    | 100.0              | 49                                                                        |                       | 49                                                     | 0                   |          |                                                                       |                                                     |                      |
| 1   | 384                                    | 91.7               | 44.93                                                                     |                       | 45                                                     | 4                   | 91.84    | 1.001                                                                 | 0.14                                                |                      |
| 2   | 589                                    | 81.8               | 40.06                                                                     |                       | 40                                                     | 5                   | 81.63    | 0.998                                                                 | -0.13                                               |                      |
| 3   | 850                                    | 69.1               | 33.86                                                                     |                       | 34                                                     | 6                   | 69.39    | 1.004                                                                 | 0.30                                                |                      |
| 4   | 1180                                   | 53.1               | 26.01                                                                     |                       | 26                                                     | 8                   | 53.06    | 1.000                                                                 | -0.02                                               |                      |
| 5   | 1345                                   | 45.1               | 22.09                                                                     |                       | 22                                                     | 4                   | 44.90    | 0.996                                                                 | -0.18                                               |                      |
| 6   | 1598                                   | 32.8               | 16.07                                                                     |                       | 16                                                     | 6                   | 32.65    | 0.995                                                                 | -0.15                                               |                      |
| 7   | 1893                                   | 18.5               | 9.06                                                                      |                       | 9                                                      | 7                   | 18.37    | 0.994                                                                 | -0.12                                               |                      |
| 8   | 2018                                   | 12.4               | 6.09                                                                      |                       | 6                                                      | 3                   | 12.24    | 0.985                                                                 | -0.18                                               |                      |
| 9   | 2102                                   | 8.3                | 4.09                                                                      | > x3/4 >              | 3                                                      | 2                   | 8.16     | 0.978                                                                 | -0.19                                               |                      |
| 10  | 2102                                   | 8.3                | 4.1                                                                       |                       | 3                                                      | 0                   |          |                                                                       |                                                     |                      |
| 11  | 2168                                   | 5.1                | 2.5                                                                       |                       | 1                                                      | 1                   | 5.44     | 1.058                                                                 | 0.30                                                |                      |
| 12  | 2168                                   | 5.1                | 2.5                                                                       | > x1/2 >              | 1                                                      | 0                   |          |                                                                       |                                                     |                      |
| 13  | 2274                                   | 0.0                | 0.0                                                                       |                       | 0                                                      | 1                   |          |                                                                       |                                                     |                      |
| 14  |                                        |                    |                                                                           |                       |                                                        |                     |          |                                                                       |                                                     |                      |
| 15  |                                        |                    |                                                                           |                       |                                                        |                     |          |                                                                       |                                                     |                      |
| 16  |                                        |                    |                                                                           |                       |                                                        |                     |          |                                                                       |                                                     |                      |
| 17  |                                        |                    |                                                                           |                       |                                                        |                     |          |                                                                       |                                                     |                      |
| 18  |                                        |                    |                                                                           |                       |                                                        |                     |          |                                                                       |                                                     |                      |
| 19  |                                        |                    |                                                                           |                       |                                                        |                     |          |                                                                       |                                                     |                      |
| n = |                                        |                    |                                                                           |                       |                                                        |                     | 47       | 2                                                                     |                                                     |                      |

The measurement of the Mossad (1996) study number of patients who recovered from the colds is described on page v of Supplementary Material 3 for Hemilä (2011)

This is a new calculation of the corresponding recovery from the common cold and censoring data

**Mossad reported:**  
2 Zn participants dropped out after 7 to 16 days  
The days were not reported and 9 and 11 days are inferred from the Kaplan-Meier curves

On the right side of this table is the comparison of the measured curve and the Kaplan-Meier estimates based on the imputations  
The differences are minor and consistent with inaccuracy of drawings

### Placebo group

Placebo (n=50)

| Day | pixels | To<br>Fig<br>scale<br>(0 to 100%) | Based on censoring,<br>(-1 participant censored)<br>rescaling on the days |                       | The bold No:s<br>are reported in<br>Mossad's<br>figure |                     |          | Calculation of<br>Kaplan-Meier estimates<br>from the inferred figures |                                                     |                      |
|-----|--------|-----------------------------------|---------------------------------------------------------------------------|-----------------------|--------------------------------------------------------|---------------------|----------|-----------------------------------------------------------------------|-----------------------------------------------------|----------------------|
|     |        |                                   | To<br>persons<br>7th                                                      | To<br>persons<br>15th | To<br>person<br>Integers                               | Cured<br>per<br>day | Censored | This<br>column                                                        | Difference<br>between<br>measured and<br>calculated | Relative<br>Absolute |
| 0   | 213    | 100.0                             | 50                                                                        |                       | 50                                                     | 0                   |          |                                                                       |                                                     |                      |
| 1   | 213    | 100.0                             | 50                                                                        |                       | 50                                                     | 0                   |          |                                                                       |                                                     |                      |
| 2   | 382    | 91.8                              | 45.90                                                                     |                       | 46                                                     | 4                   | 92       | 1.002                                                                 | 0.20                                                |                      |
| 3   | 502    | 86.0                              | 42.99                                                                     |                       | 43                                                     | 3                   | 86       | 1.000                                                                 | 0.02                                                |                      |
| 4   | 710    | 75.9                              | 37.94                                                                     |                       | 38                                                     | 5                   | 76       | 1.002                                                                 | 0.11                                                |                      |
| 5   | 792    | 71.9                              | 35.95                                                                     |                       | 36                                                     | 2                   | 72       | 1.001                                                                 | 0.09                                                |                      |
| 6   | 996    | 62.0                              | 31.00                                                                     |                       | 31                                                     | 5                   | 62       | 1.000                                                                 | -0.01                                               |                      |
| 7   | 1116   | 56.2                              | 28.09                                                                     | > x27/28 >            | 26                                                     | 3                   | 56       | 0.997                                                                 | -0.19                                               |                      |
| 8   | 1334   | 45.6                              | 22.8                                                                      |                       | 21                                                     | 5                   | 45.63    | 1.000                                                                 | 0.02                                                |                      |
| 9   | 1379   | 43.4                              | 21.7                                                                      |                       | 20                                                     | 1                   | 43.56    | 1.003                                                                 | 0.13                                                |                      |
| 10  | 1414   | 41.7                              | 20.9                                                                      |                       | 19                                                     | 1                   | 41.38    | 0.992                                                                 | -0.35                                               |                      |
| 11  | 1511   | 37.0                              | 18.5                                                                      |                       | 17                                                     | 2                   | 37.02    | 1.000                                                                 | 0.00                                                |                      |
| 12  | 1603   | 32.6                              | 16.3                                                                      |                       | 15                                                     | 2                   | 32.67    | 1.003                                                                 | 0.11                                                |                      |
| 13  | 1644   | 30.6                              | 15.3                                                                      |                       | 14                                                     | 1                   | 30.49    | 0.997                                                                 | -0.08                                               |                      |
| 14  | 1732   | 26.3                              | 13.1                                                                      |                       | 12                                                     | 2                   | 26.13    | 0.994                                                                 | -0.17                                               |                      |
| 15  | 1835   | 21.3                              | 10.7                                                                      |                       | 9                                                      | 2                   | 21.78    | 1.023                                                                 | 0.48                                                |                      |
| 16  | 1938   | 16.3                              | 8.2                                                                       | > x9/10 >             | 6                                                      | 2                   | 16.94    | 1.039                                                                 | 0.64                                                |                      |
| 17  | 2050   | 10.9                              | 5.4                                                                       |                       | 4                                                      | 2                   | 11.29    | 1.039                                                                 | 0.42                                                |                      |
| 18  | 2101   | 8.4                               | 4.2                                                                       |                       | 3                                                      | 1                   | 8.47     | 1.009                                                                 | 0.08                                                |                      |
| 19  |        |                                   |                                                                           |                       | 0                                                      | 1                   |          |                                                                       |                                                     |                      |
| n = |        |                                   |                                                                           |                       |                                                        |                     | 44       | 6                                                                     |                                                     |                      |

**Mossad reported:**  
4 placebo participants dropped out after 7 to 16 days  
The days were not reported and 7, 15 and 16 days are inferred from the Kaplan-Meier curves

2 had censored data on the 19th day and 1 was cured on the 19th day
